# Supplementary material for: Synthesis and fluorescence properties of columnar porous silicon: the influence of Cu-coating on the photoluminescence behaviour of hydrofluoric-acid-treated aged columnar porous silicon
Source: Royal Society of Chemistry journal article supplement (doi:10.1039/c5nj00909j), 2015-01-01
Supplement: c5nj00909j1.pdf [file c5nj00909j1.pdf]

## Supporting Information for New Journal of Chemistry

### Synthesis and fluorescence property of columnar porous silicon: the influence of Cu-coating on photoluminescence behaviour from hydrofluoric-acid-treated aged columnar porous silicon

Xu Lu<sup>a</sup>, Yohei Ishida<sup>a</sup>, and Tetsu Yonezawa<sup>a,\*</sup>

<sup>a</sup> *Division of Materials Science and Engineering, Faculty of Engineering,  
Hokkaido University, Kita 13, Nishi 8, Kita-ku, Sapporo, Hokkaido 060-8628,  
Japan*

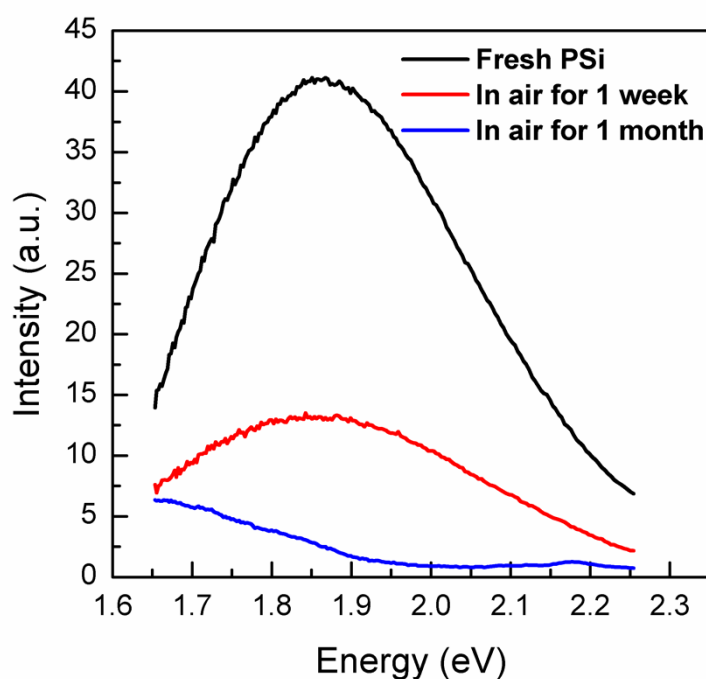

**Figure S1.** Photoluminescence spectra of as-prepared porous silicon at different periods after preparation (The sample was kept under ambient air conditions).

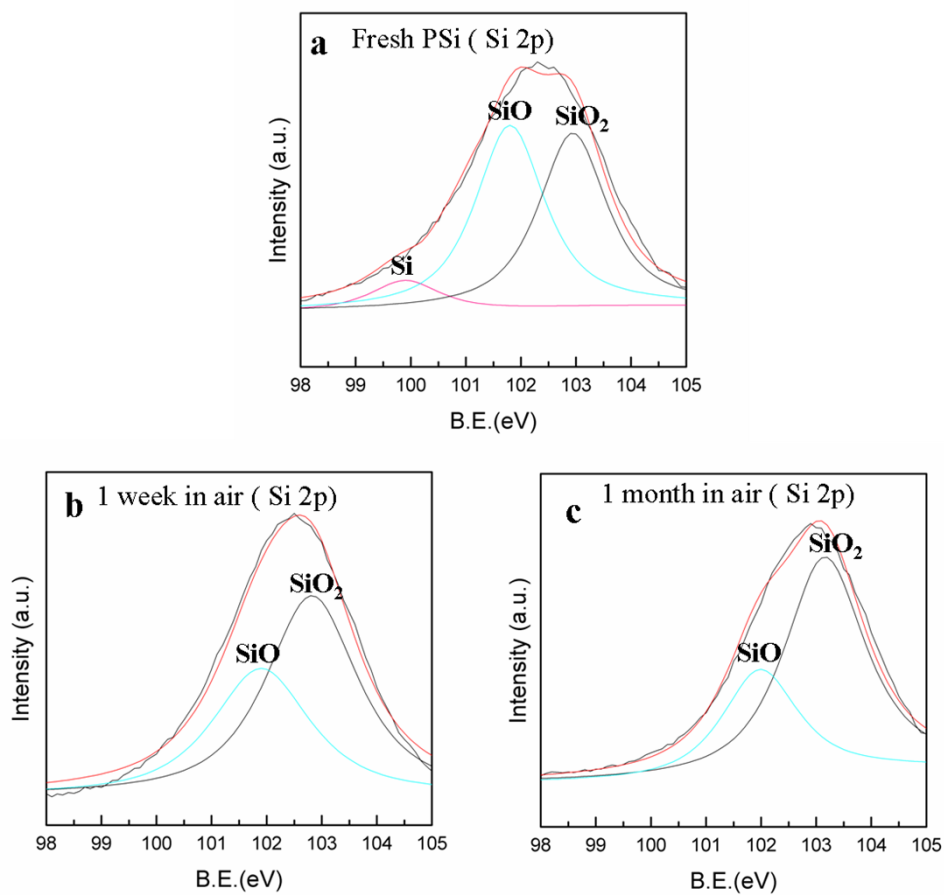

**Figure S2.** Narrow X-ray photospectra of Si 2p of freshly prepared porous silicon sample (a), sample kept under ambient conditions for one week (b), and one month (c).

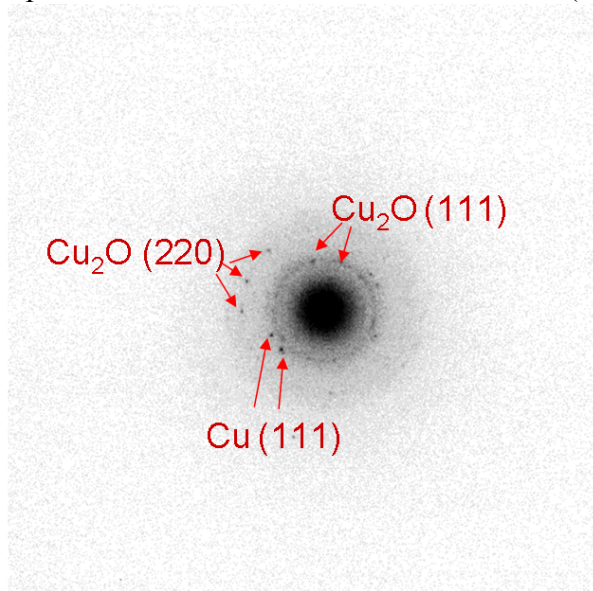

**Figure S3.** Selected area electron diffraction pattern of Cu-coated porous silicon (The diffraction area is the same as the area shown in Figure 3b).

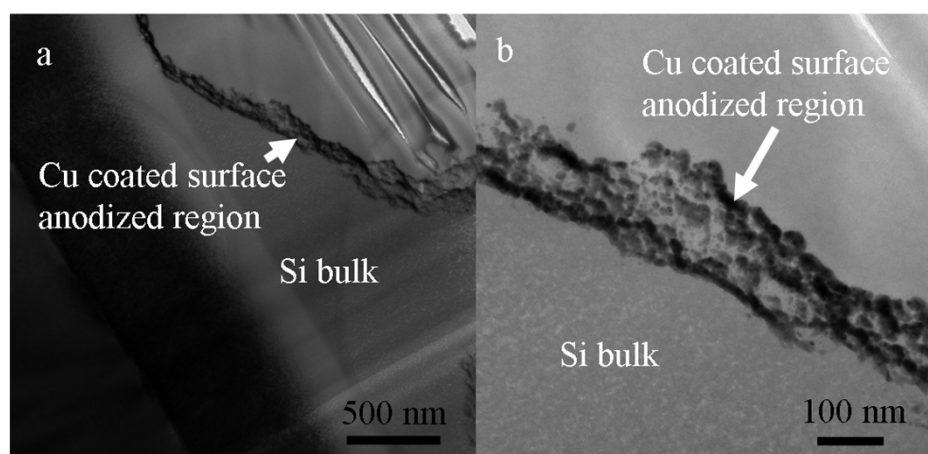

**Figure S4.** (a) TEM lateral image of the Cu-PSi, the sputtering time of Cu was 1 min.  
(b) Enlarged lateral image of the Cu-PSi.
